# Supplementary material
Source: PubMed Central journal article supplement (PMC3260801)

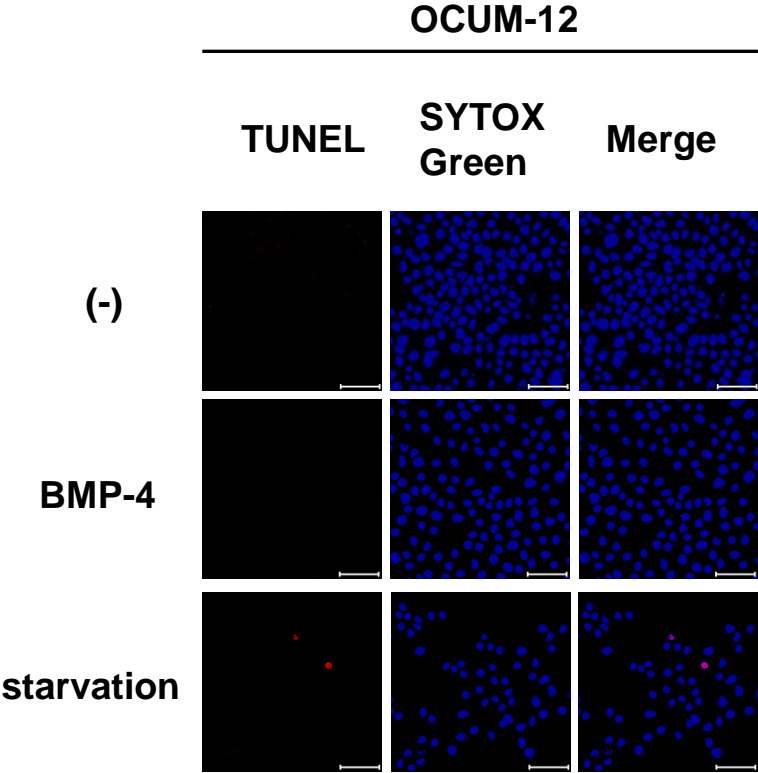

Supplement: mmc1.pdf [file mmc1.pdf]

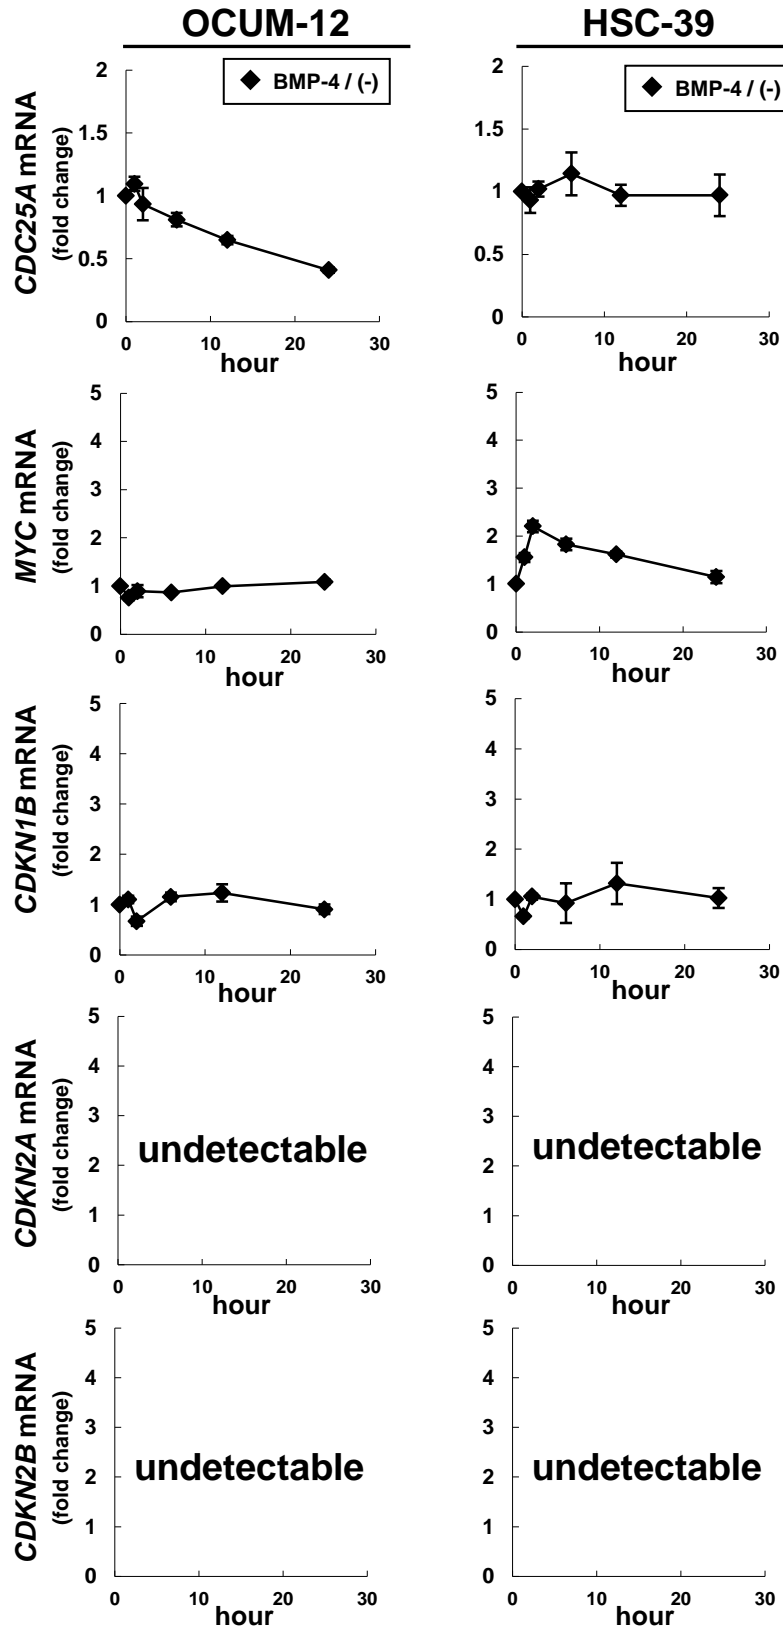

Supplement: mmc2.pdf [file mmc2.pdf]

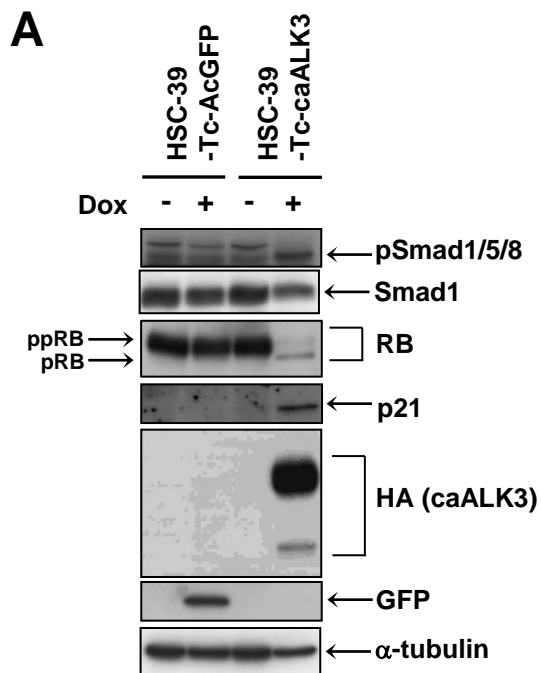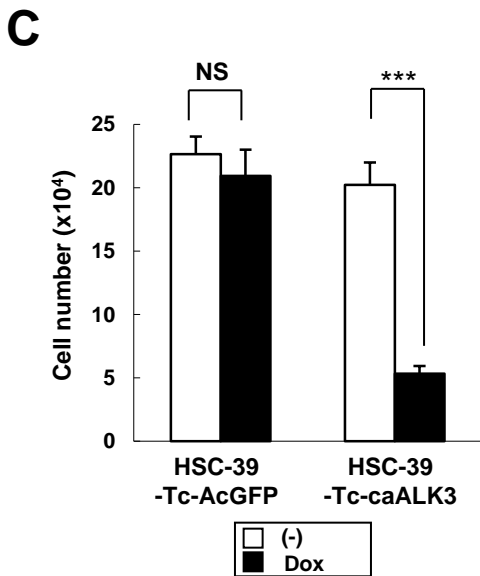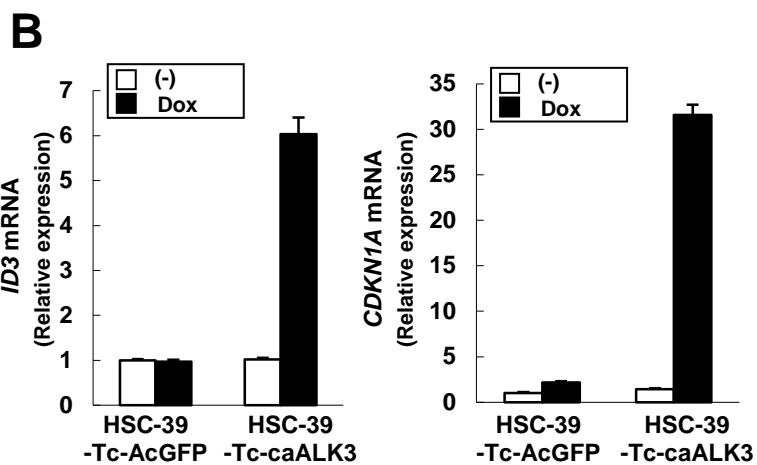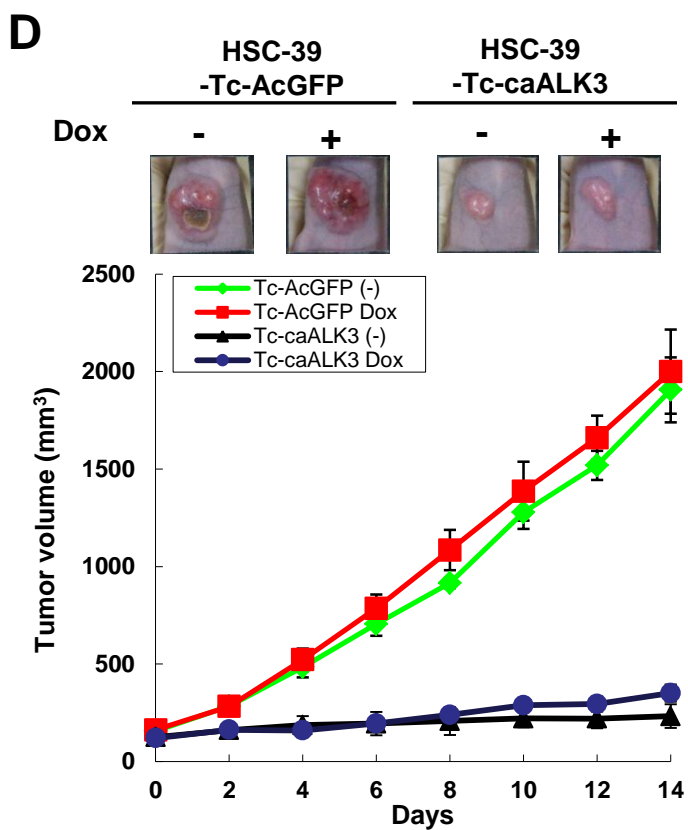

Supplement: mmc3.pdf [file mmc3.pdf]

**A**

**H&E**

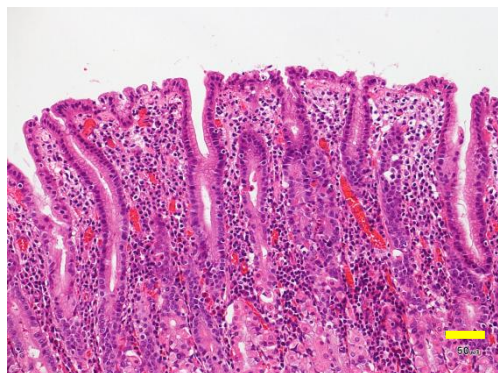

**pSmad1/5/8**

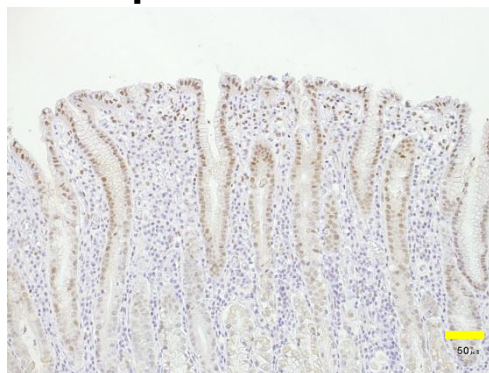

**p21**

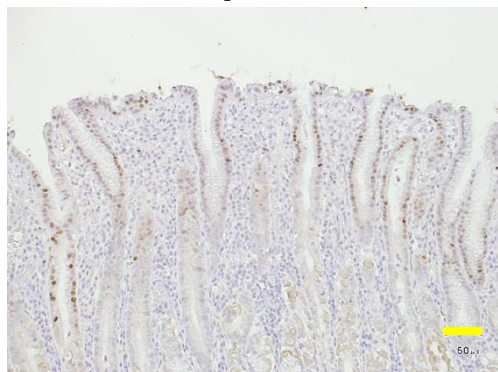

**MIB-1**

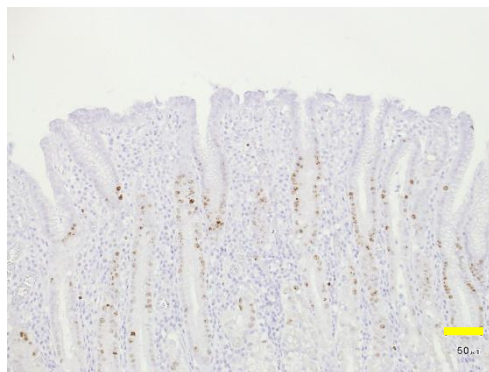

**B**

**H&E**

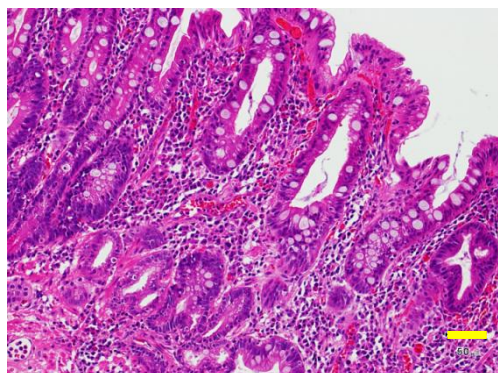

**pSmad1/5/8**

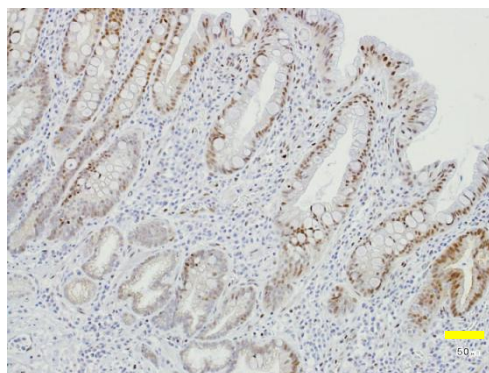

**p21**

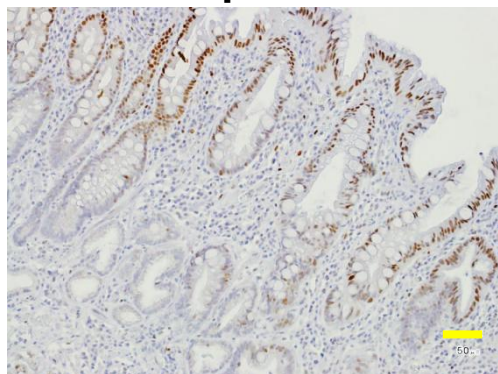

**MIB-1**

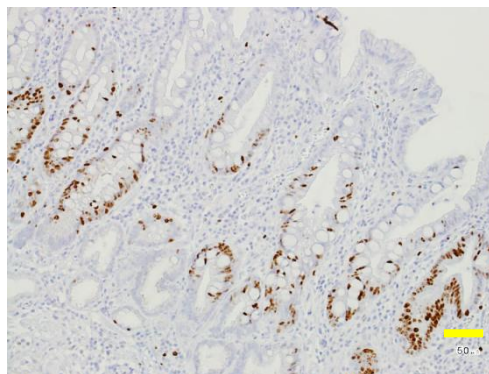

Supplement: mmc4.pdf [file mmc4.pdf]
